# Supplementary material
Source: PubMed Central journal article supplement (PMC3187118)
Supplement: supp_77_19_7007__1.pdf [file supp_77_19_7007__1.pdf]

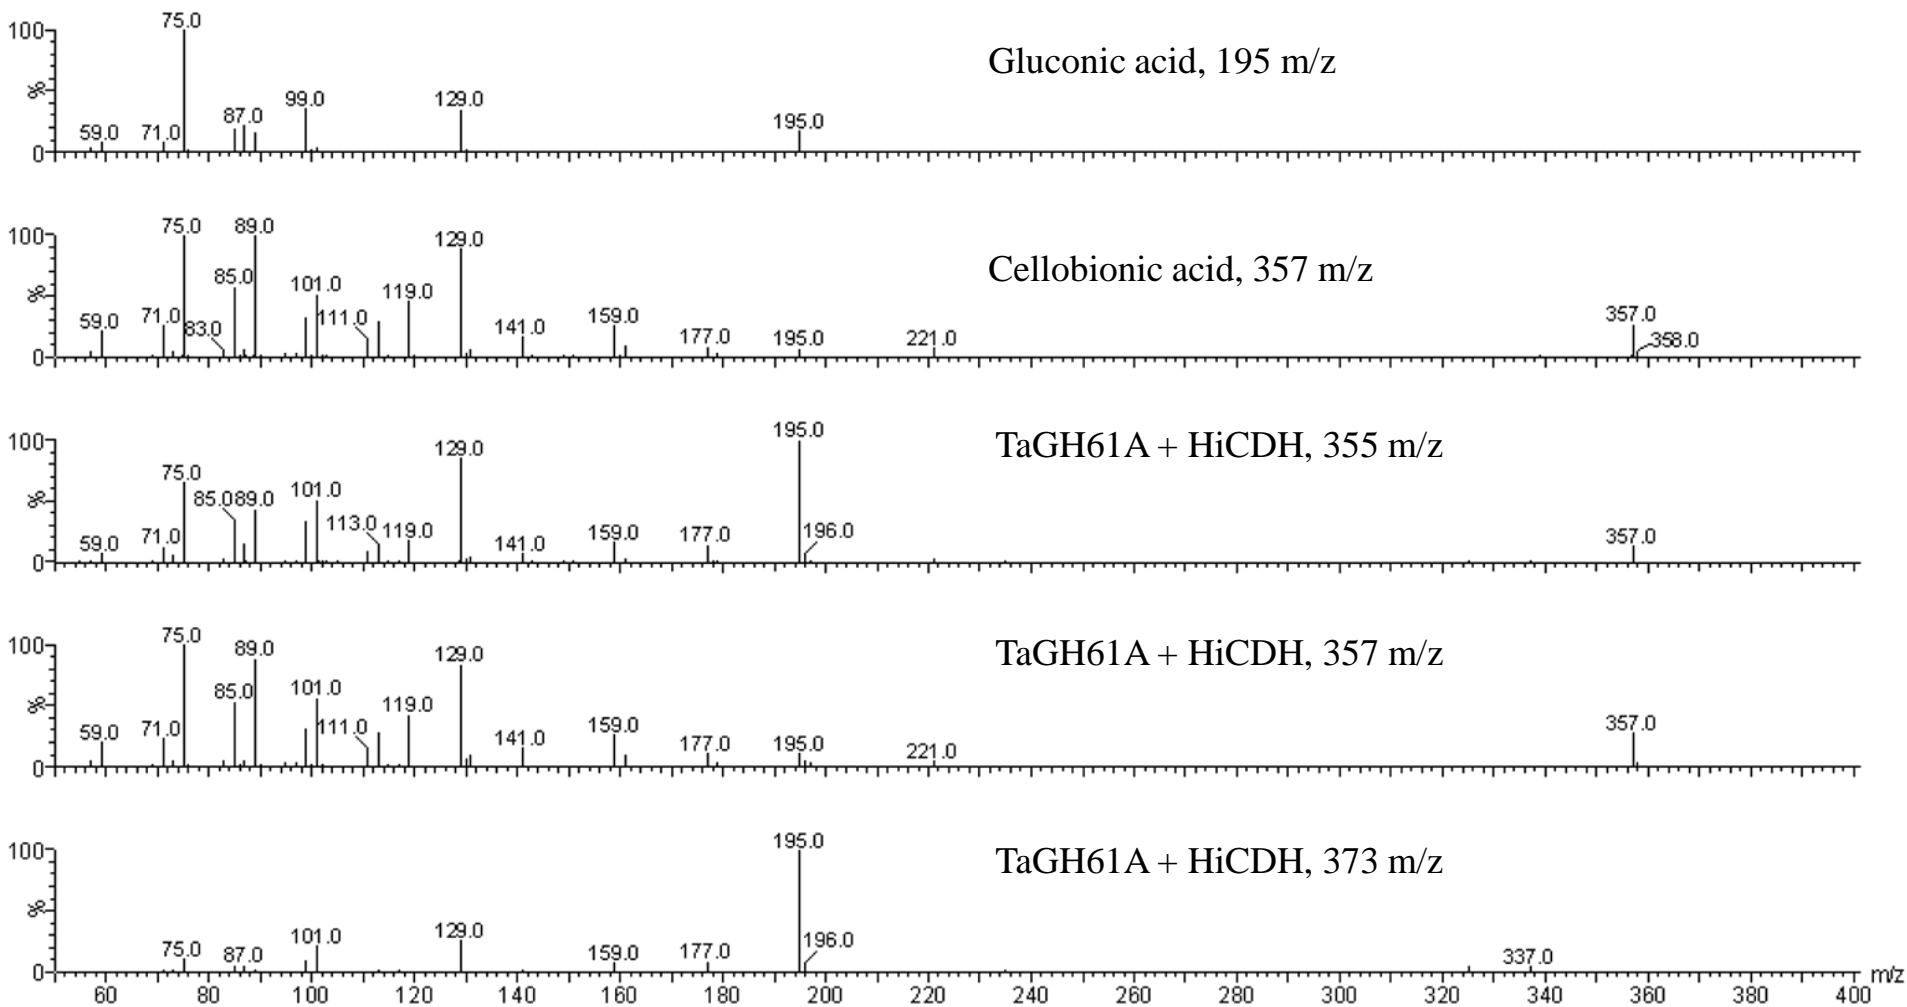

**Supplemental Figure 1:**

Tandem MS/MS analysis of standards and 5 g/l PASC treated with 50 mg TaGH61A per gram cellulose and 5 mg HiCDH per gram cellulose (with and without addition of AfBG) in 20 mM ammonium acetate of pH 5, 0.1 mM MnSO<sub>4</sub>, for 4 days at 50 °C.
